# Supplementary material for: An injectable fluorescent and iodinated hydrogel for preoperative localization and dual image-guided surgery of pulmonary nodules
Source: Royal Society of Chemistry journal article supplement (doi:10.1039/d4bm00035h), 2024-01-01
Supplement: d4bm00035h2.pdf [file d4bm00035h2.pdf]

**Supplementary materials for:**

**An injectable fluorescent and iodinated hydrogel for  
preoperative localization and dual image-guided surgery of  
pulmonary nodules**

Woojin Back<sup>1†</sup>, Jiyun Rho<sup>2,3†</sup>, Kyoung Su Kim<sup>2,3</sup>, Hwan Seok Yong<sup>4</sup>, Ok Hwa Jeon<sup>2,3</sup>,  
Byeong Hyeon Choi<sup>2,3</sup>, Hyun Koo Kim<sup>2,3\*</sup>, and Ji-Ho Park<sup>1\*</sup>

<sup>1</sup>Department of Bio and Brain Engineering and KAIST Institute for Health Science  
and Technology, Korea Advanced Institute of Science and Technology (KAIST),  
Daejeon, Korea

<sup>2</sup>Department of Thoracic and Cardiovascular Surgery, Korea University Guro  
Hospital, College of Medicine Korea University

<sup>3</sup>Department of Biomedical Sciences, College of Medicine Korea University

<sup>4</sup>Department of Radiology, Korea University Guro Hospital, College of Medicine  
Korea University

\*Email: kimhyunkoo@korea.ac.kr (H.K. Kim), jihopark@kaist.ac.kr (J.-H Park).

<sup>†</sup>These authors contributed equally to this work.

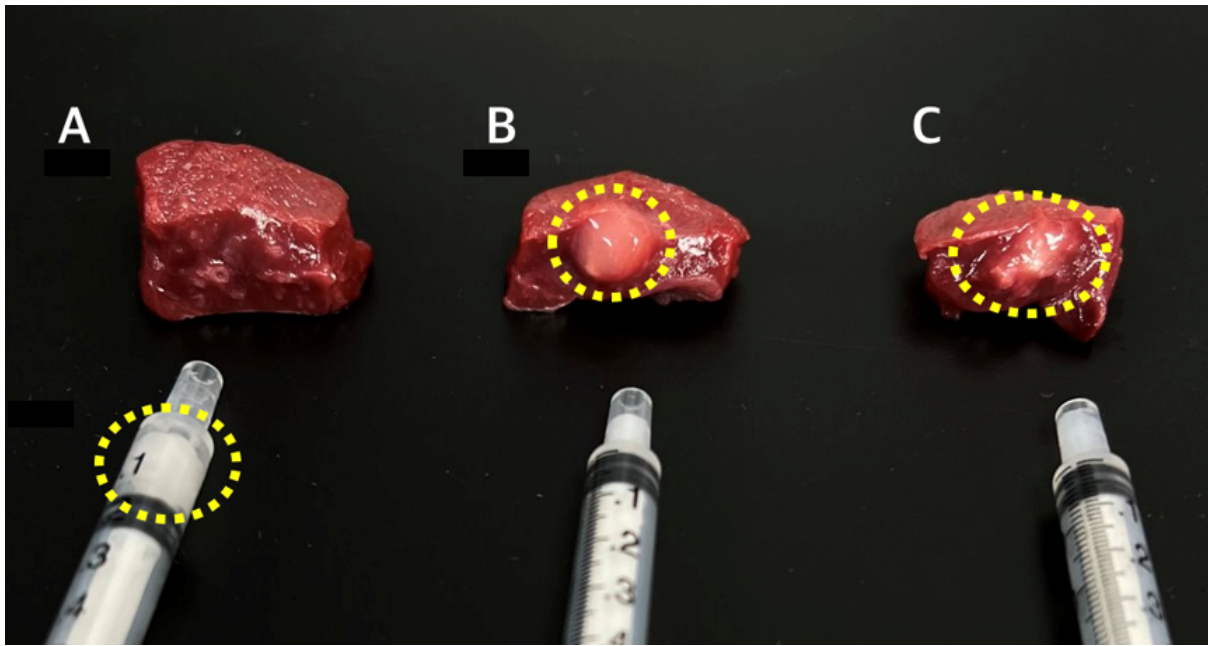

**Supplementary Figure 1. Further screening of a clinically appropriate gelation time by utilizing pig lungs.** Emulsified hydrogels each having a gelation time of A) 10 seconds (syringe clogging), B) 30 seconds (well-formed), and C) 50 seconds (leakage), respectively.

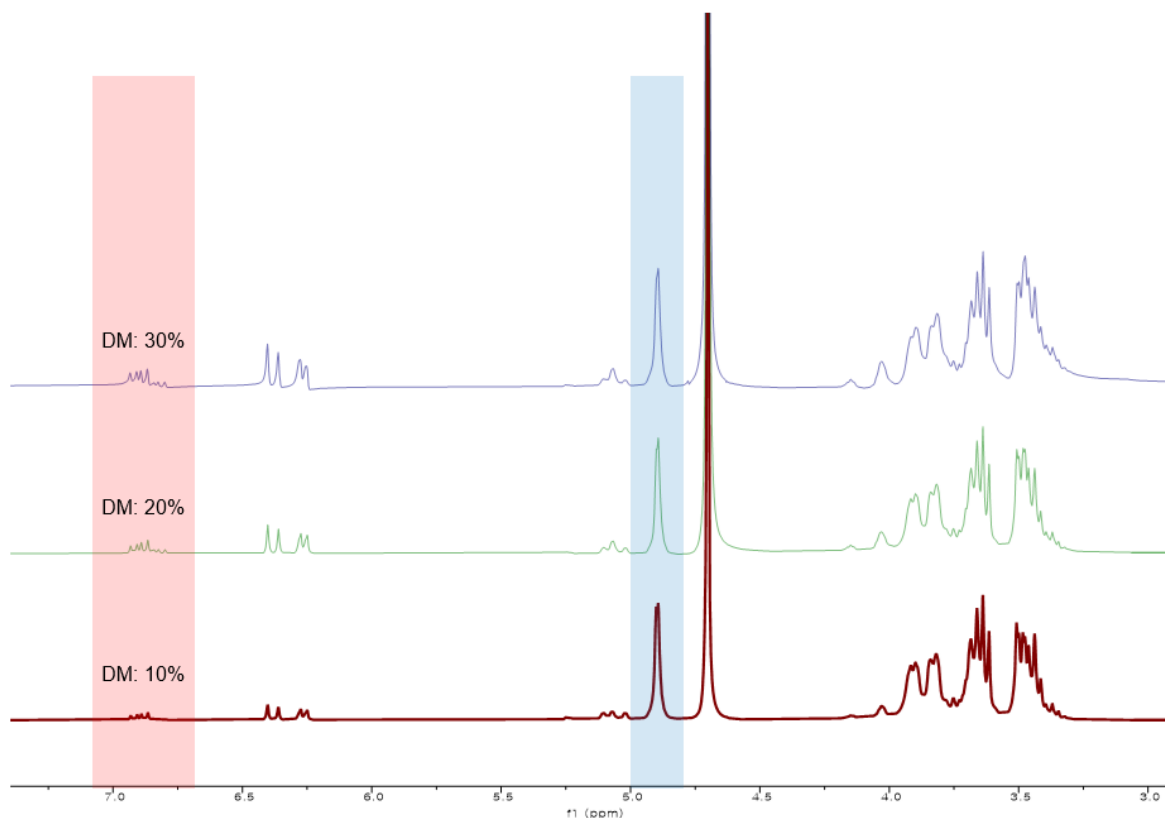

**Supplementary Figure 2. <sup>1</sup>H NMR spectra for the synthesis of vinyl sulfone-modified dextran (Dex-VS).** Different degrees of modifications (DM) of dextran hydroxyl (-OH) groups by vinyl sulfone (-VS) groups were achieved by varying the reaction time. DM was determined by comparing the relative amounts of vinyl protons at  $\delta = 6.82 - 6.9$  (1H, red box) to pyranose  $\delta = 4.87 - 5.29$  (1H, blue box).

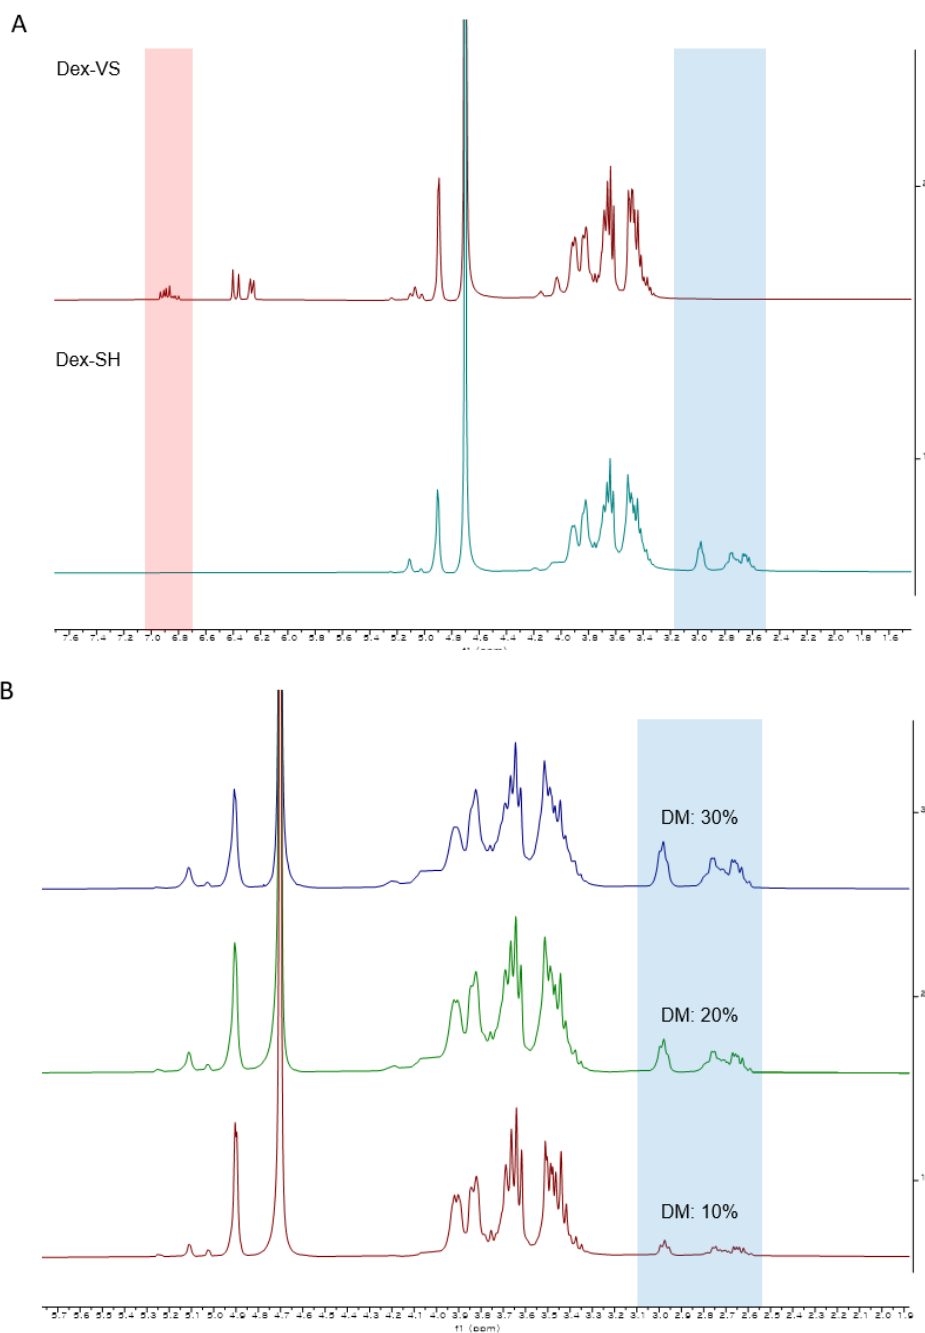

**Supplementary Figure 3. <sup>1</sup>H NMR spectra for the synthesis of thiol-modified dextran (Dex-SH).** A) Successful synthesis of thiol-modified dextran (Dex-SH) was confirmed by the disappearance of vinyl protons at  $\delta = 6.82 - 6.9$  (1H, red box) and the formation of proton peaks at  $\delta = 2.5 - 3.1$  (blue box). B) <sup>1</sup>H NMR spectra for different DMs of Dex-SH synthesized.

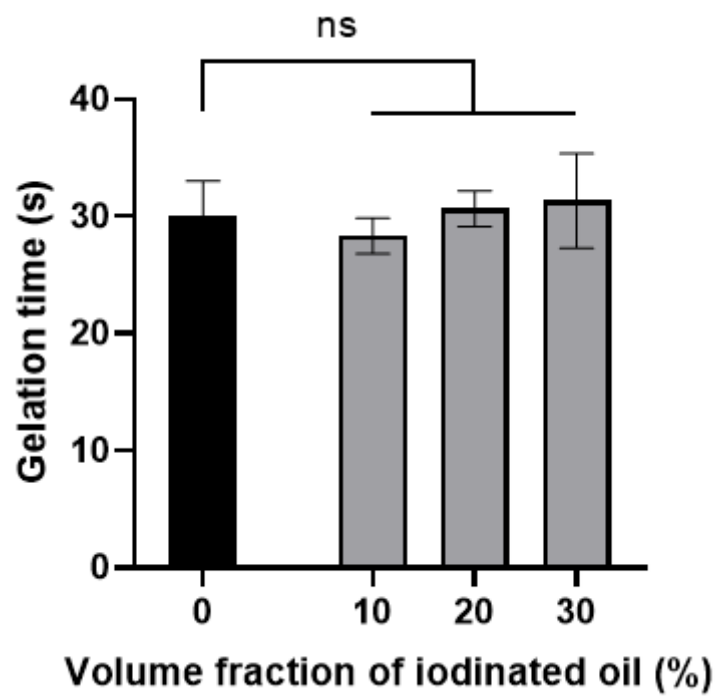

**Supplementary Figure 4.** Gelation time of hydrogels containing different volume fractions of iodinated oil (n=3, one-way ANOVA).

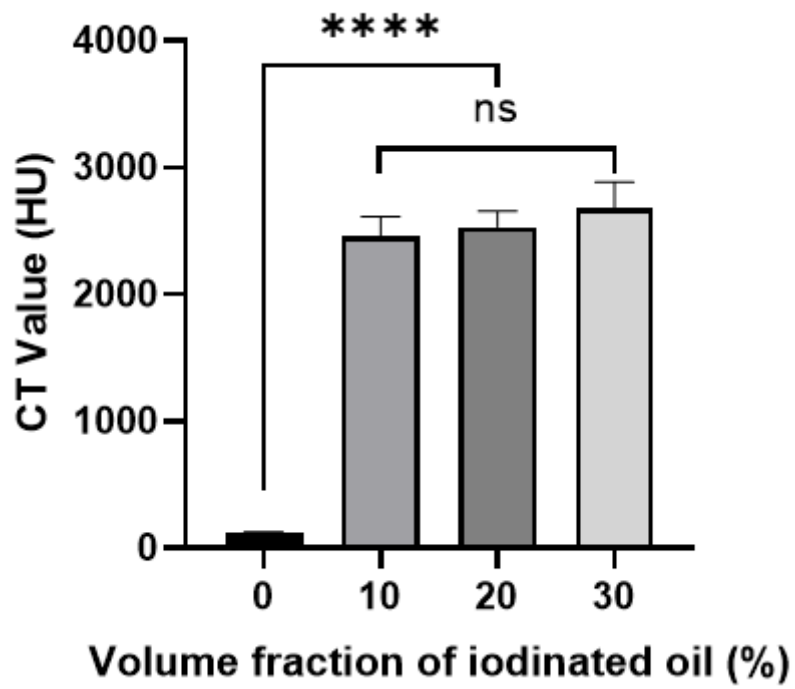

**Supplementary Figure 5.** CT values of hydrogels containing different volume fractions of iodinated oil (n=3, one-way ANOVA).

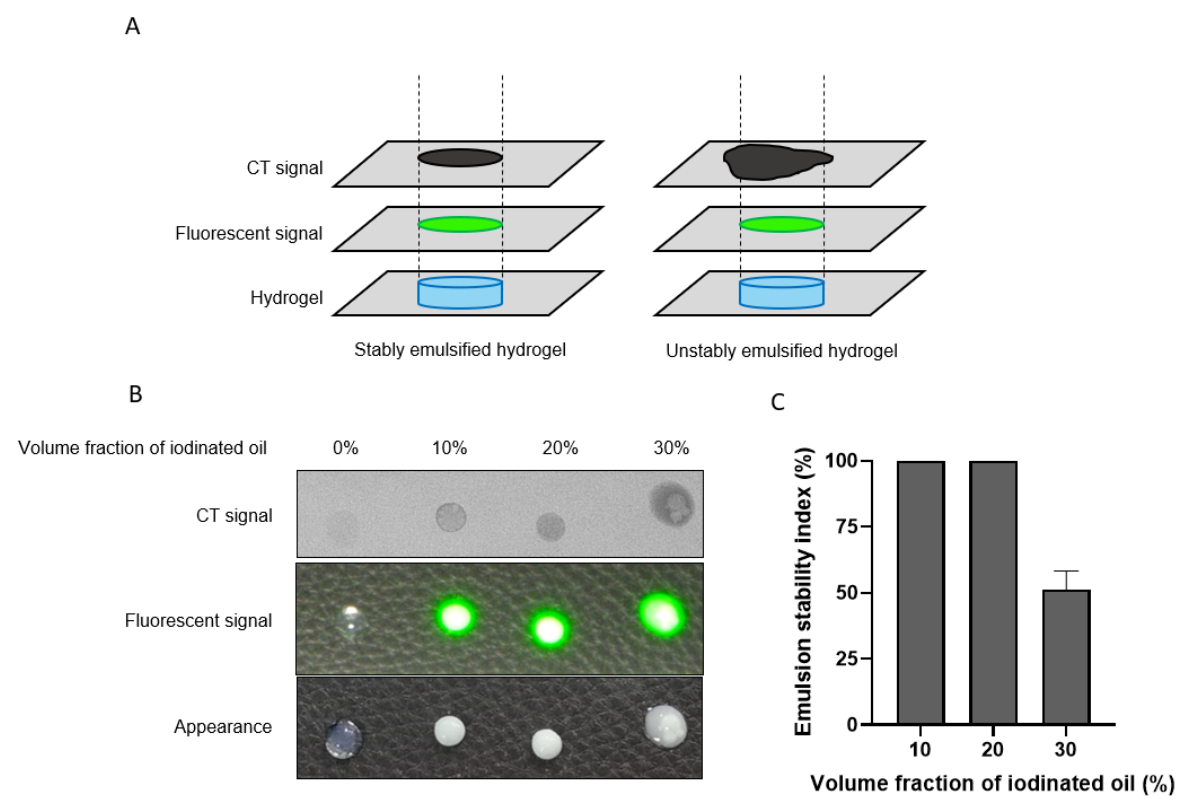

**Supplementary Figure 6.** A) Schematic illustration of hydrogels with strong (left) and weak emulsion stability (right). B) Representative images of fluorescent hydrogels formed at different volume fractions of iodinated oil. Unstable emulsion begins to form when the volume fraction of iodinated oil becomes 30% (v/v). C) Emulsion stability index (%) of hydrogels containing different volume fractions of iodinated oil (n=3).

**Supplementary Table 1.** Quantification of free thiol (-SH) groups by Ellman's assay

|                                                  |       |       |       |
|--------------------------------------------------|-------|-------|-------|
| Degree of modification by vinyl sulfone(-VS) (%) | 10    | 20    | 30    |
| Degree of modification by thiol (-SH) (%)        | 10.36 | 22.18 | 28.66 |
